# Supplementary material for: CD80 Expression on Tumor Cells Alters Tumor Microenvironment and Efficacy of Cancer Immunotherapy by CTLA-4 Blockade
Source: MDPI journal article supplement (doi:10.3390/cancers13081935), 2021-04-16
Supplement: s1 [file s1]

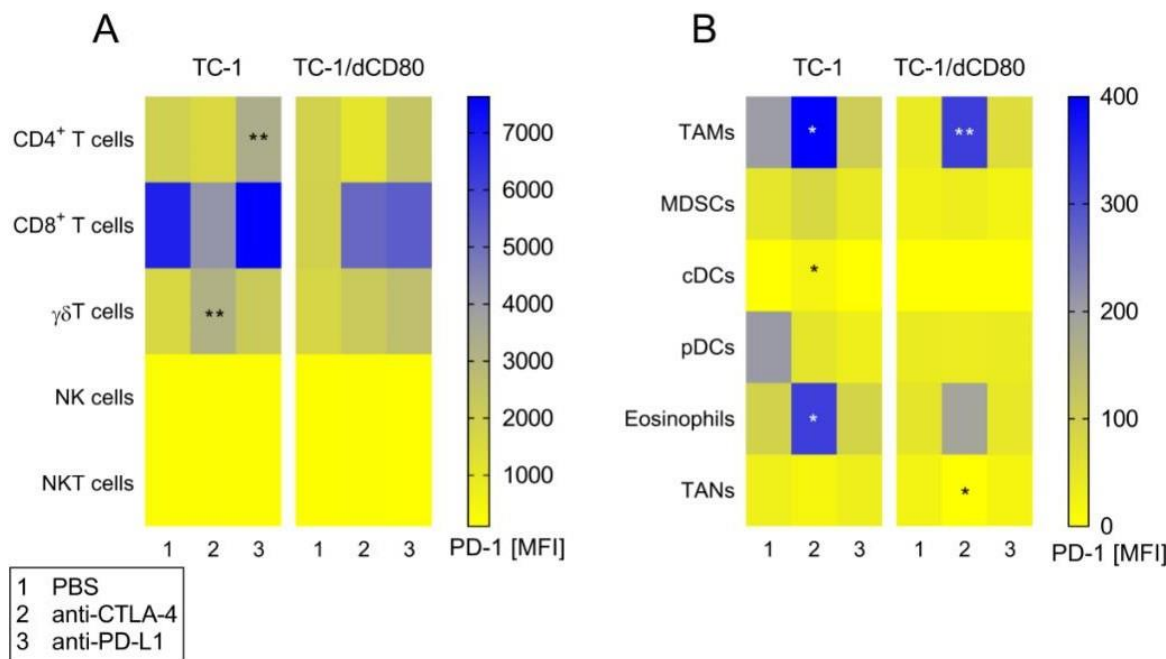

**Figure S1.** Surface expression of PD-1 by leucocytes infiltrating TC-1- and TC-1/dCD80-induced tumors. Mice ( $n = 4$ ) were treated with anti-CTLA-4 or anti-PD-L1 and PBS was used as the control. Lymphoid (A) and myeloid cells (B) isolated from tumors were analyzed by flow cytometry. MFI—median fluorescent intensity. The statistical significance of differences between the PBS- and antibody-treated mice was evaluated; \* $p < 0.05$ , \*\* $p < 0.01$ .

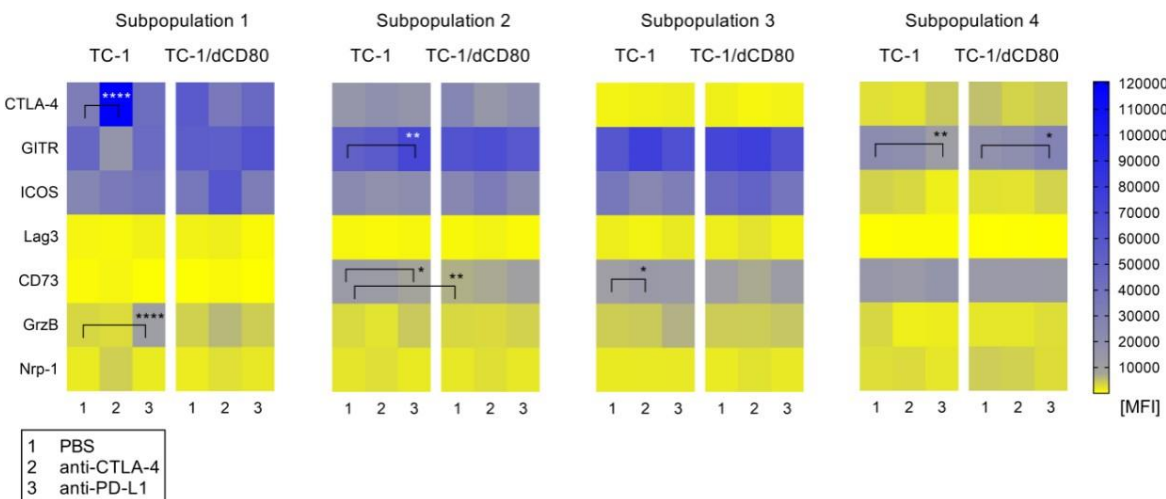

**Figure S2.** Expression of Treg markers on the FlowSOM-identified subpopulations 1-4. Cells were isolated from tumors ( $n = 4$ ) treated with PBS, anti-CTLA-4, or anti-PD-L1. MFI—median fluorescent intensity; \* $p < 0.05$ , \*\* $p < 0.01$ , \*\*\*\* $p < 0.0001$ .

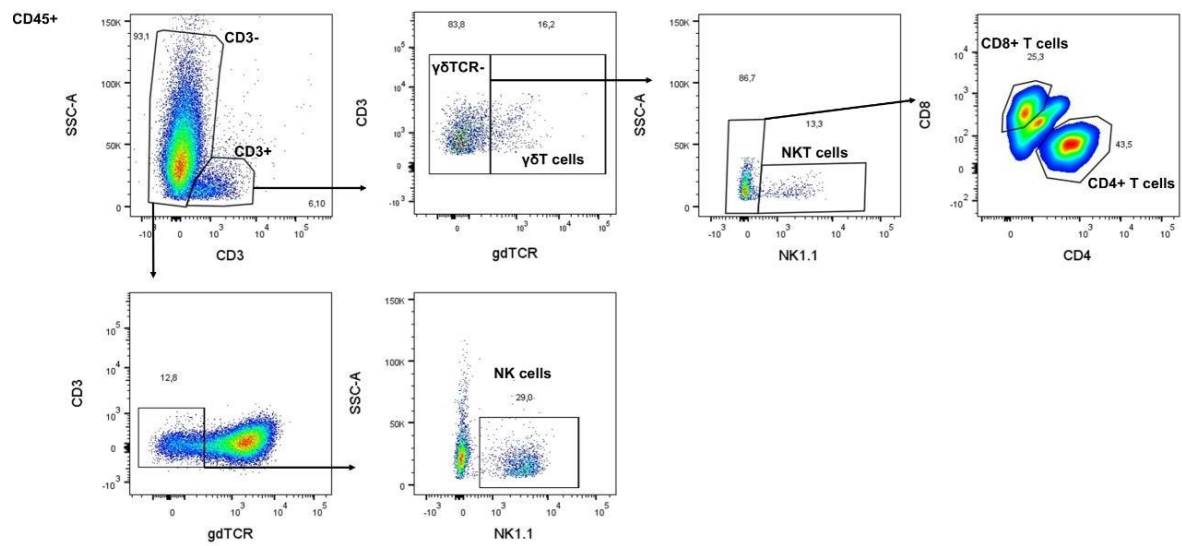

**Figure S3.** Gating strategy for lymphoid subpopulations.

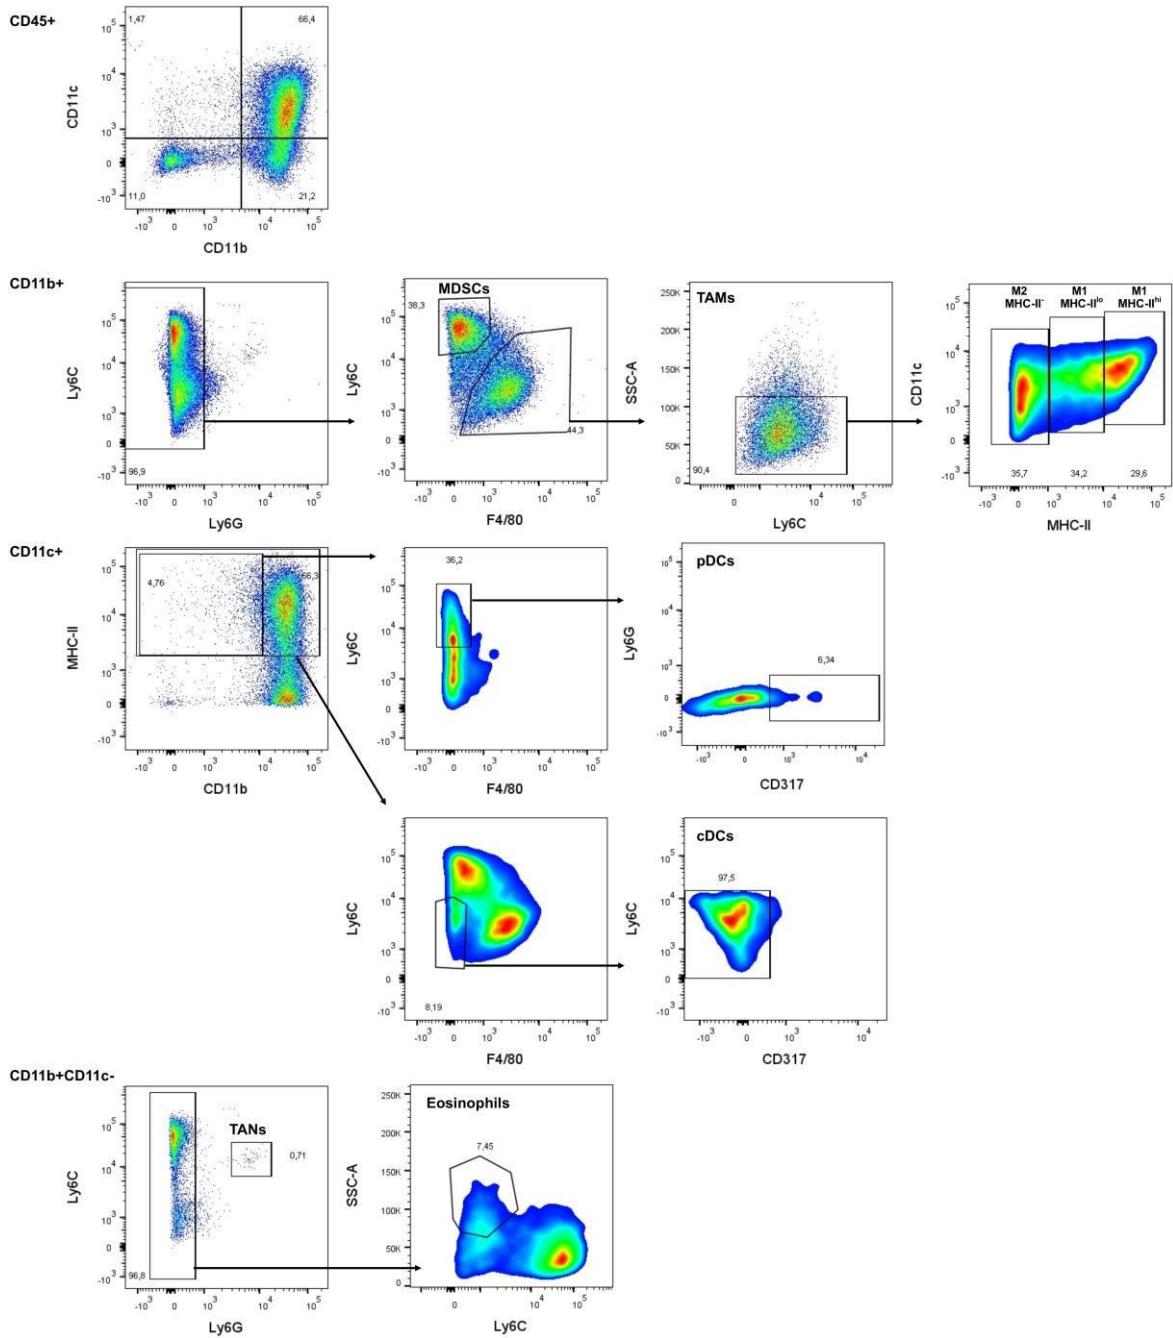

**Figure S4.** Gating strategy for myeloid subpopulations.
